# Supplementary material for: A Porous Geopolymer Containing Ti-Bearing Blast Furnace Slag: Synthesis, Characterization, and Adsorption-Photodegradation Studies towards Methylene Blue Removal under Visible Light Condition
Source: MDPI journal article supplement (doi:10.3390/molecules28093673), 2023-04-24
Supplement: s1 [file s1]

---

## Supplementary data

### **A porous geopolymer containing Ti-bearing blast furnace slag: synthesis, characterization, and adsorption-photodegradation studies towards methylene blue removal under visible light condition**

Yijian Cheng<sup>1</sup>, Kun Wang<sup>2</sup>, Peng Li<sup>1,\*</sup>, Hongwei Guo<sup>1</sup>, Bingji Yan<sup>1,3</sup>, Dong Chen<sup>1,\*</sup>,  
Wei Zhao<sup>1,4</sup>

*1 Shagang School of Iron and Steel, Soochow University, Suzhou 215021, China ;  
chengyijian21@163.com (Y.C.)*

*2 State Key Laboratory of Heavy Oil, China University of Petroleum (East China),  
Qingdao 266580, China*

*3 State Key Laboratory of Advanced Metallurgy, University of Science and Technology  
Beijing, Beijing 100083, China*

*4 Key Laboratory of Metallurgical Emission Reduction & Resources Recycling (Anhui  
University of Technology), Ministry of Education, Maanshan 243002, China*

(\*Corresponding authors: lipeng@suda.edu.cn (P.L.); chend@suda.edu.cn (D.C.)

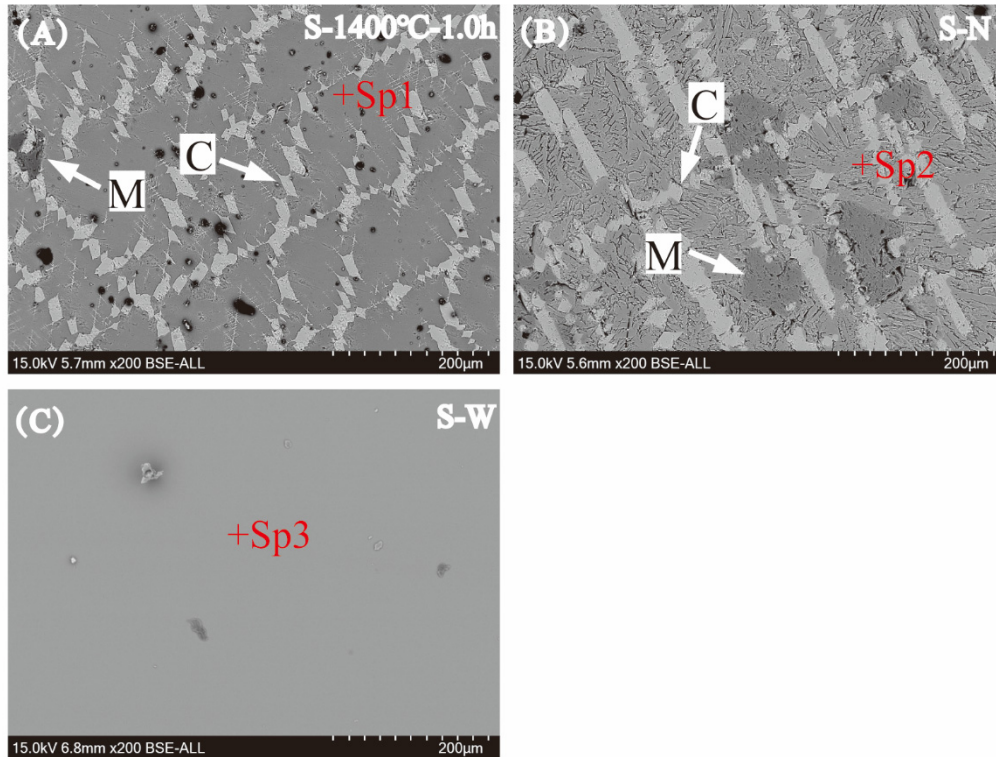

**Figure S1.** SEM images of modified slags: (A) S-1400°C-1.0h, (B) S-N and (C) S-W. (C: CaTiO<sub>3</sub>; M: MgAl<sub>2</sub>O<sub>4</sub>).

---

**Table S1.** EDS point scan data in modified slag matrix.

|     |               | Main element composition (wt.%) |      |      |      |      |     |
|-----|---------------|---------------------------------|------|------|------|------|-----|
|     |               | O                               | Ca   | Si   | Al   | Ti   | Mg  |
| Sp1 | S-1400°C-1.0h | 42.7                            | 15.1 | 15.1 | 10.6 | 5.0  | 5.6 |
| Sp2 | S-N           | 42.2                            | 14.8 | 14.1 | 14.0 | 4.5  | 5.9 |
| Sp3 | S-W           | 42.7                            | 20.3 | 10.6 | 9.3  | 12.7 | 4.4 |

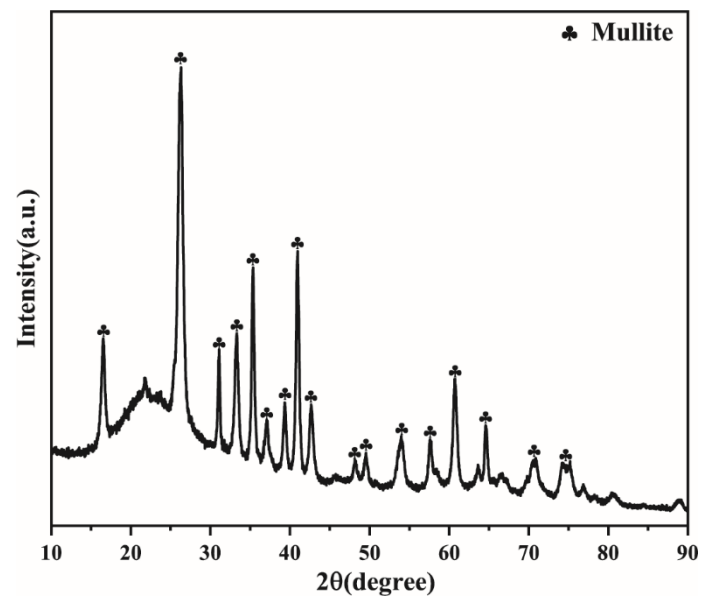

**Figure S2.** XRD pattern of the kaolin.

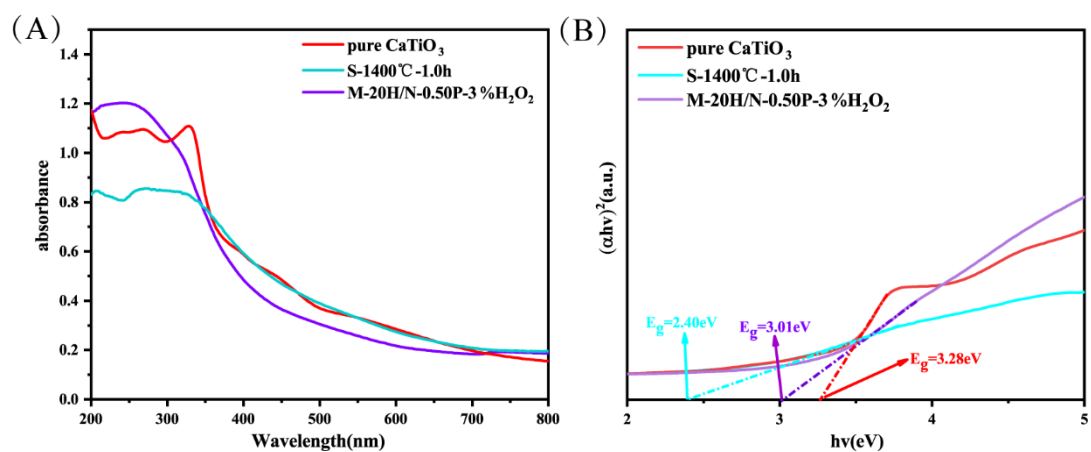

**Figure S3.** (A) UV-Vis-DRS of the prepared samples and (B) Tauc plots of the corresponding samples.

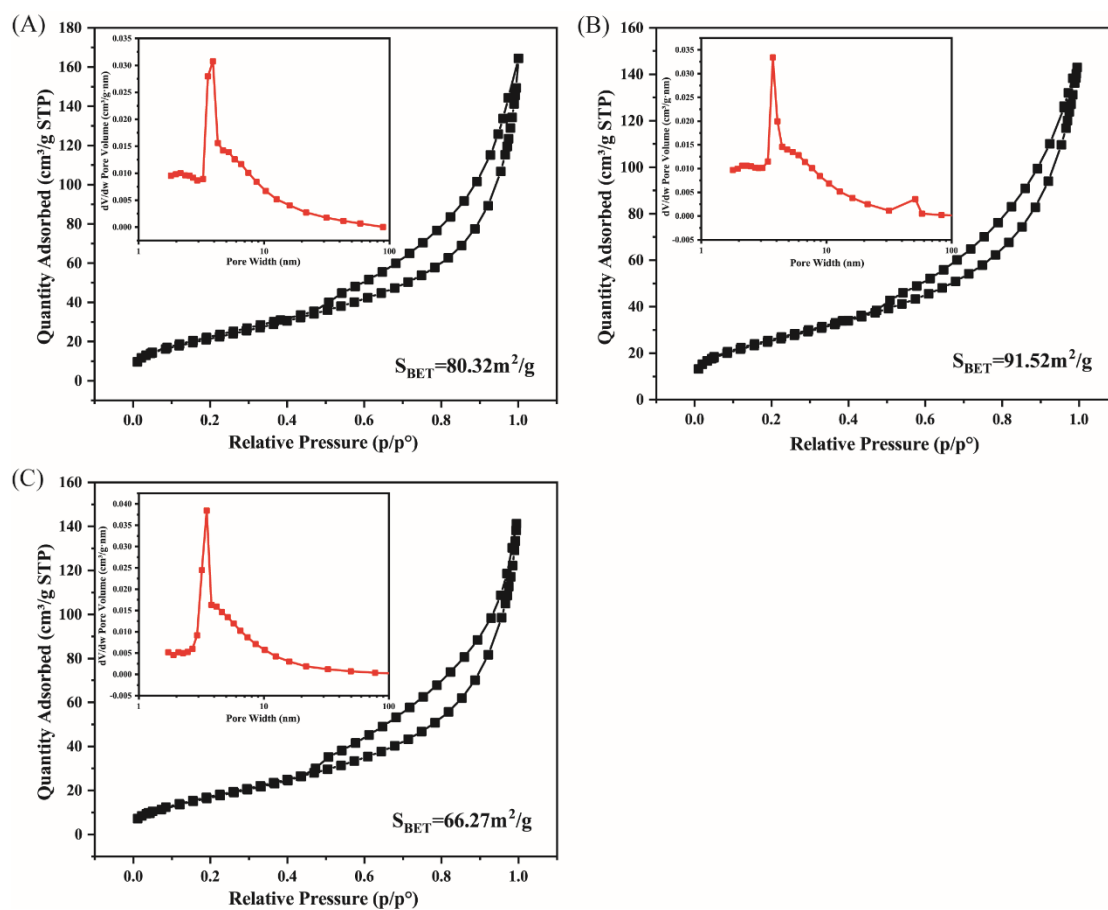

**Figure S4.** N<sub>2</sub> adsorption-desorption and pore size distribution: (A) M-20H/N-0.25P-3%H<sub>2</sub>O<sub>2</sub>; (B) W-20H/N-0.25P-3%H<sub>2</sub>O<sub>2</sub>, and (C) N-20H/N-0.25P-3%H<sub>2</sub>O<sub>2</sub>.

---

### *S2.3.1. Adsorption kinetic characteristics*

The adsorption data were fitted to the pseudo-first-order and pseudo-second-order rate equations. Pseudo-first-order rate equation for adsorption in liquid-solid systems described in Equation S1.

$$\log(Q_e - Q_t) = \log Q_e - \frac{k_1}{2.303} t \quad (S1)$$

Where  $k_1$  ( $\text{min}^{-1}$ ) is the first-order rate constant. Pseudo-second-order rate equation based on the amount of adsorbate on the adsorbent as displayed in Equation S2.

$$\frac{t}{Q_t} = \frac{1}{k_2 Q_e^2} + \frac{1}{Q_e} t \quad (S2)$$

Where  $k_2$  ( $\text{g}/(\text{mg} \cdot \text{min})$ ) is the second-order rate constant. By plotting  $t/Q_t$  versus  $t$ , the second-order rate constant ( $k_2$ ) and  $Q_e$  are obtained from intercept and slope, respectively.

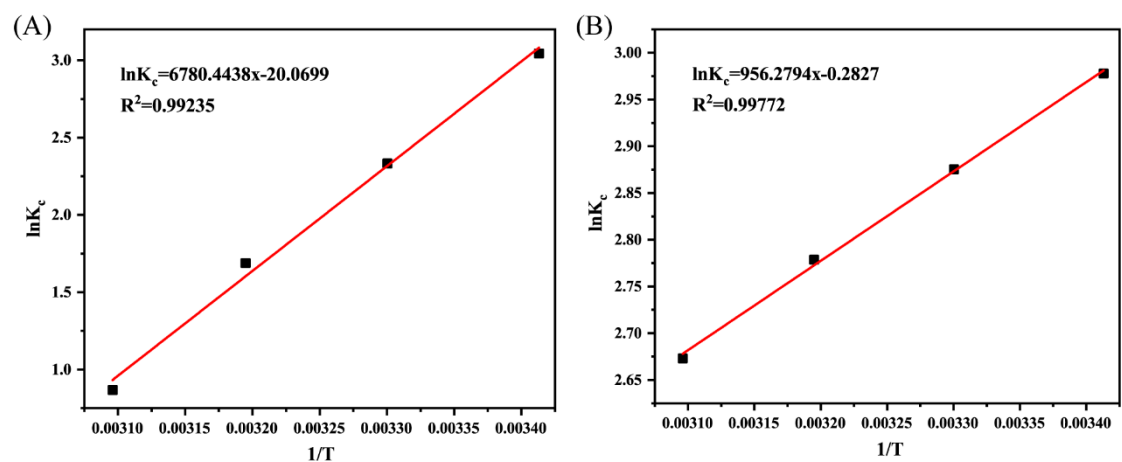

**Figure S5.** Adsorption thermodynamics of geopolymers: (A) M-20H/N-0.50P-3% $H_2O_2$  and (B) N-20H/N-0.50P-3% $H_2O_2$ .



---

### S2.3.3. Adsorption isotherms

L model:

$$\frac{C_e}{Q_e} = \frac{C_e}{Q_0} + \frac{1}{Q_0 K_L} \quad (S3)$$

F model:

$$\ln Q_e = \frac{1}{n} \ln C_e + \ln K_F \quad (S4)$$

T model:

$$Q_e = B \ln A + B \ln C_e \quad (S5)$$

Where  $Q_0$  is the maximum adsorption capacity of a single molecular layer, mg/g;  $K_L$  is the Langmuir constant, L/mg;  $K_F$  is the Freundlich constant;  $1/n$  is the adsorption index; A and B represent the isotherm constant associated to the heat of sorption (J/mole) and isotherm constant (L/g).

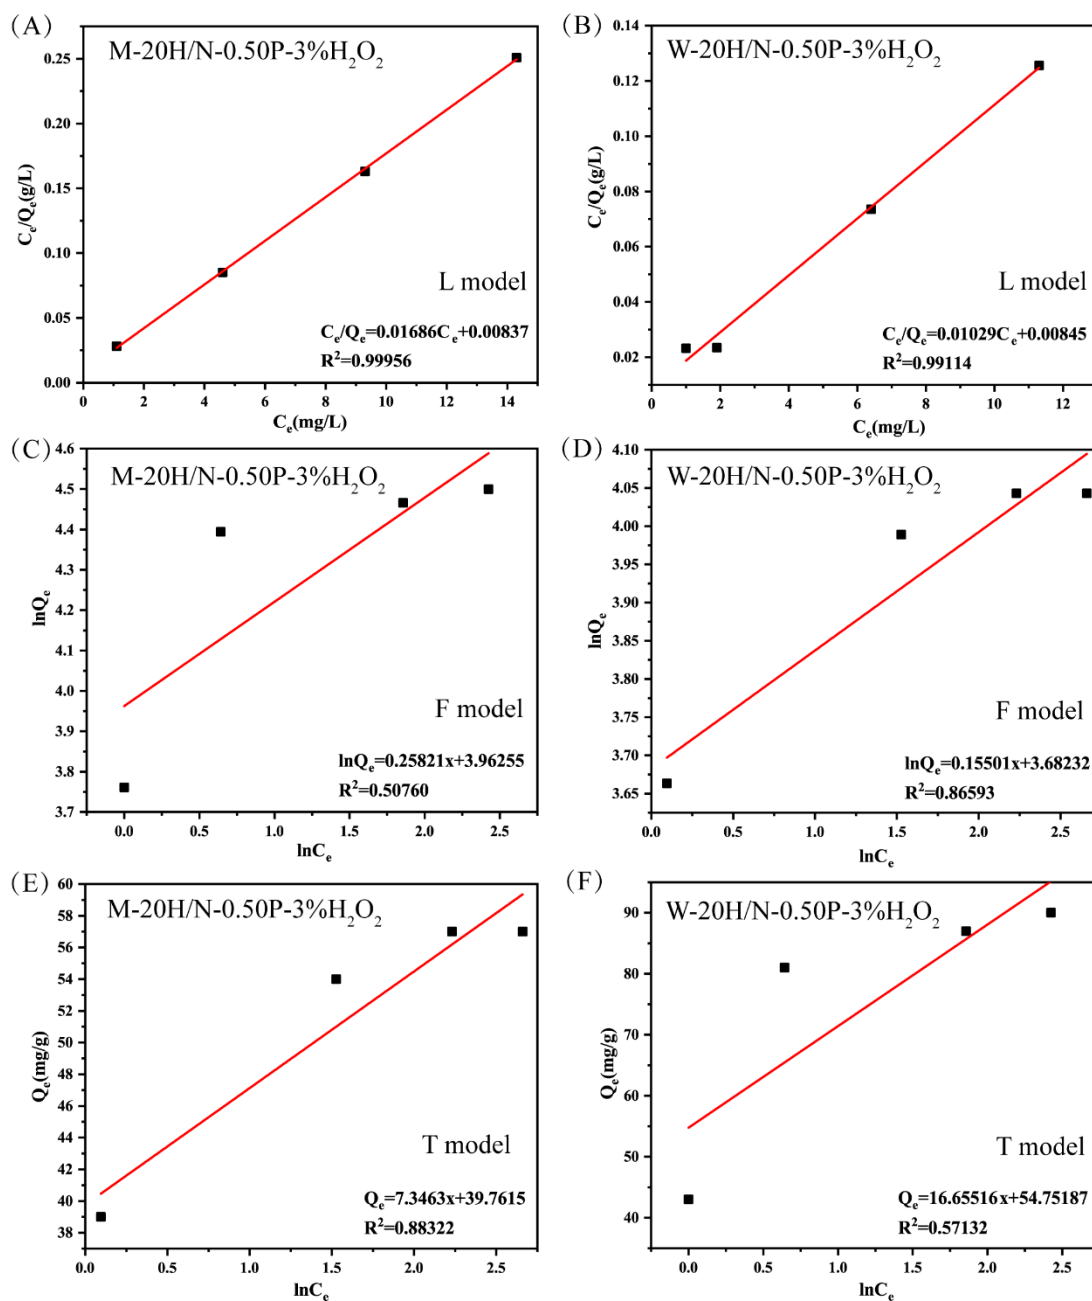

**Figure S6.** Corresponding adsorption isotherms for MB fitted by L model, F model, and T model of M-20H/N-0.50P-3% $H_2O_2$  and W-20H/N-0.50P-3% $H_2O_2$ .

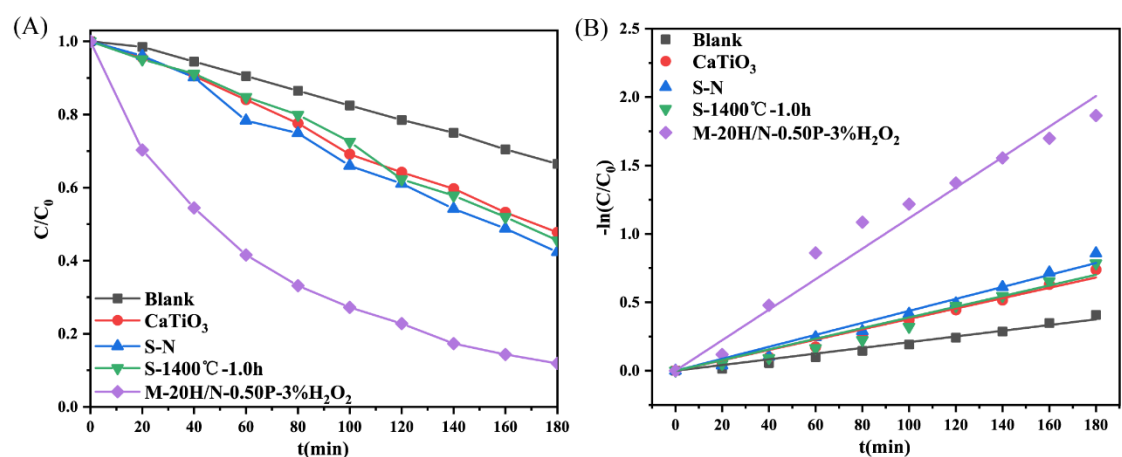

**Figure S7.** (A) Direct adsorption-photodegradation curves under different samples; (B) Photocatalytic degradation ( $-\ln(C/C_0)$ ) against light irradiation time) of MB at 40 °C of samples with a dosage of 50 mg.

---

**Table S2.** Experimental design for adsorption tests.

|                                           | MB<br>concentration<br>(mg/L) | MB<br>volume<br>(mL) | Dosage<br>(mg)    | Temperature<br>(°C) | Contact<br>time (min) |
|-------------------------------------------|-------------------------------|----------------------|-------------------|---------------------|-----------------------|
| Dosage                                    | 20                            | 200                  | 20, 30,<br>40, 50 | 40                  | 120                   |
| Adsorption kinetics<br>and thermodynamics | 20                            | 200                  | 50                | 20, 30, 40, 50      | 120                   |
| Adsorption isotherms                      | 5, 10, 15, 20                 | 200                  | 20                | 20                  | 120                   |

---
